# Supplementary material for: MGa2B2O7:Bi3+,Al3+ (M = Sr, Ba) blue phosphors with a quantum yield of 99% and negative thermal quenching
Source: Royal Society of Chemistry journal article supplement (doi:10.1039/d1qi00671a), 2021-01-01
Supplement: d1qi00671a1.pdf [file d1qi00671a1.pdf]

## Supplementary Information

### ***M*Ga<sub>2</sub>B<sub>2</sub>O<sub>7</sub>: Bi<sup>3+</sup>, Al<sup>3+</sup> (*M* = Sr, Ba) blue phosphors with quantum yield of 99% and negative thermal quenching**

*Shuai Yang*,<sup>1,2</sup> *Yuning Wu*,<sup>3</sup> *Fangyu Yue*,<sup>3</sup> *Ruijuan Qi*,<sup>3</sup> *Bin Jiang*,<sup>3</sup> *Jiahao Wu*,<sup>3</sup> *Yang Shen*,<sup>3</sup>  
*Chungang Duan*,<sup>3</sup> *Yongkui Shan*,<sup>1</sup> *Qingbiao Zhao*<sup>3</sup>, *Yuefei Zhang*<sup>2</sup>

<sup>1</sup>School of Chemistry and Molecular Engineering, East China Normal University, Shanghai, 200241 China

<sup>2</sup>Key Laboratory for Green Chemical Process of Ministry of Education, Wuhan Institute of Technology, Wuhan 430073, China

<sup>3</sup>Key Laboratory of Polar Materials and Devices (MOE), Department of Electronic Science, East China Normal University, Shanghai, 200241 China

## **Table of Contents**

|                                                                            |           |
|----------------------------------------------------------------------------|-----------|
| <b>Chemicals information .....</b>                                         | <b>3</b>  |
| <b>XRD patterns .....</b>                                                  | <b>4</b>  |
| <b>Band gap.....</b>                                                       | <b>5</b>  |
| <b>Emission spectra and Interaction between Bi<sup>3+</sup> ions .....</b> | <b>6</b>  |
| <b>Excitation spectra .....</b>                                            | <b>8</b>  |
| <b>Emission spectra of host lattice and phosphors.....</b>                 | <b>9</b>  |
| <b>Raman spectra .....</b>                                                 | <b>10</b> |
| <b>Quantum yields.....</b>                                                 | <b>13</b> |
| <b>Variable-temperature photoluminescence .....</b>                        | <b>16</b> |
| <b>Variable temperature XRD patterns .....</b>                             | <b>23</b> |
| <b>White LEDs performance .....</b>                                        | <b>24</b> |
| <b>References .....</b>                                                    | <b>26</b> |

## Chemicals information

**Table S1.** Information about chemicals.

| Chemicals                      | Information                              |
|--------------------------------|------------------------------------------|
| SrCO <sub>3</sub>              | Sigma-Aldrich, 99.9%                     |
| BaCO <sub>3</sub>              | Alfa Aesar, 99.8%                        |
| Ga <sub>2</sub> O <sub>3</sub> | Adamas Reagent Co., Ltd., 99.99%         |
| Al <sub>2</sub> O <sub>3</sub> | Beijing Hwrkchemical Co., Ltd., 99.99%   |
| H <sub>3</sub> BO <sub>3</sub> | Sigma-Aldrich, 99.97%                    |
| Ethanol                        | Nanjing Chemical Reagent Co., LTD. 99.7% |

## XRD patterns

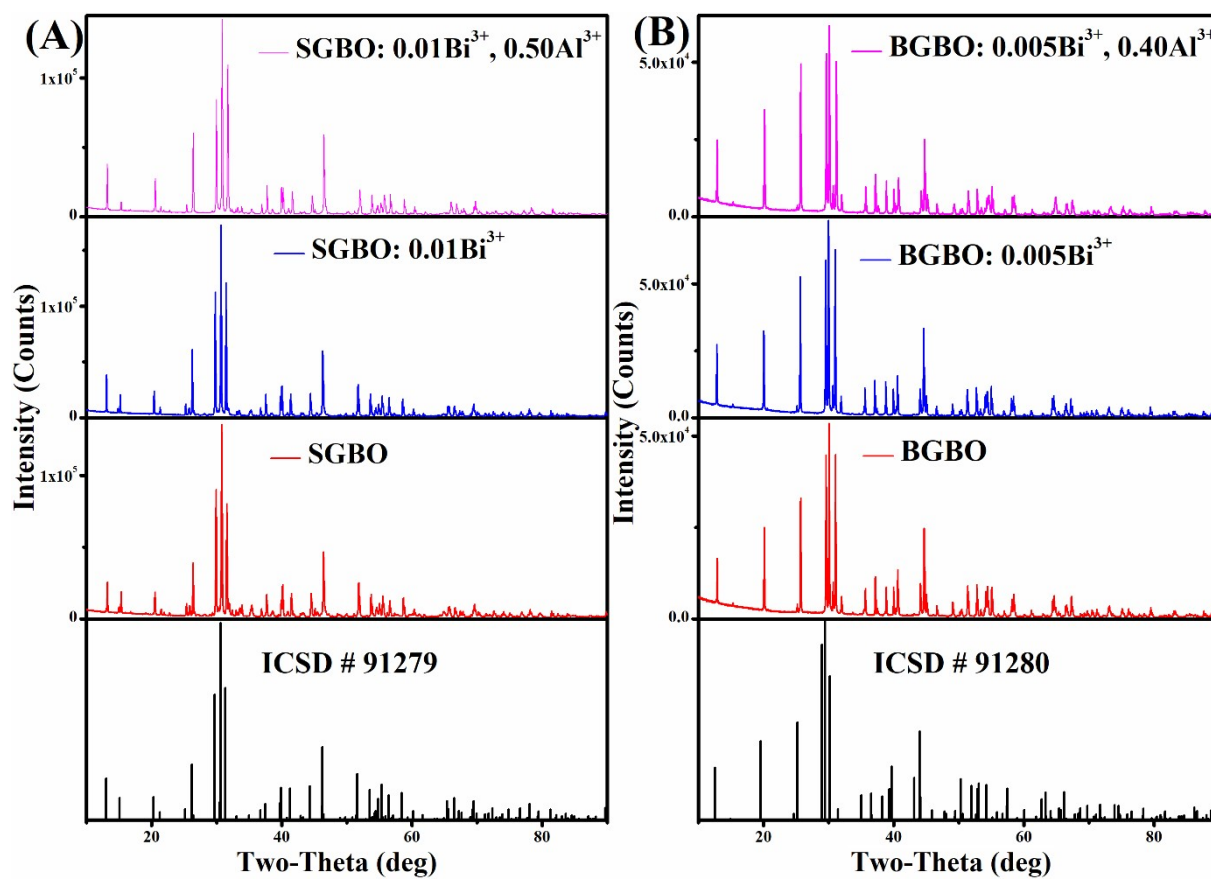

**Figure S1.** (A & B) XRD patterns of SrGa<sub>2</sub>B<sub>2</sub>O<sub>7</sub> (SGBO) host and doped phosphors and BaGa<sub>2</sub>B<sub>2</sub>O<sub>7</sub> (BGBO) host and doped phosphors.

## Band gap

The band gap was calculated by the following formula:

$$\alpha h\nu = A(h\nu - E_g)^n \quad (1)$$

where  $E_g$  is the band gap,  $h$  is the Planck constant,  $\alpha$  is the absorption rate,  $n$  is the photon frequency.  $n$  is 1/2 when the electronic transition is direct, and  $n$  is 2 when the electronic transition is indirect.<sup>1, 2</sup> For  $MGa_2B_2O_7$  ( $MGBO$ ,  $M = Sr, Ba$ ), the electronic transition is a direct transition, thus  $n$  is 1/2.

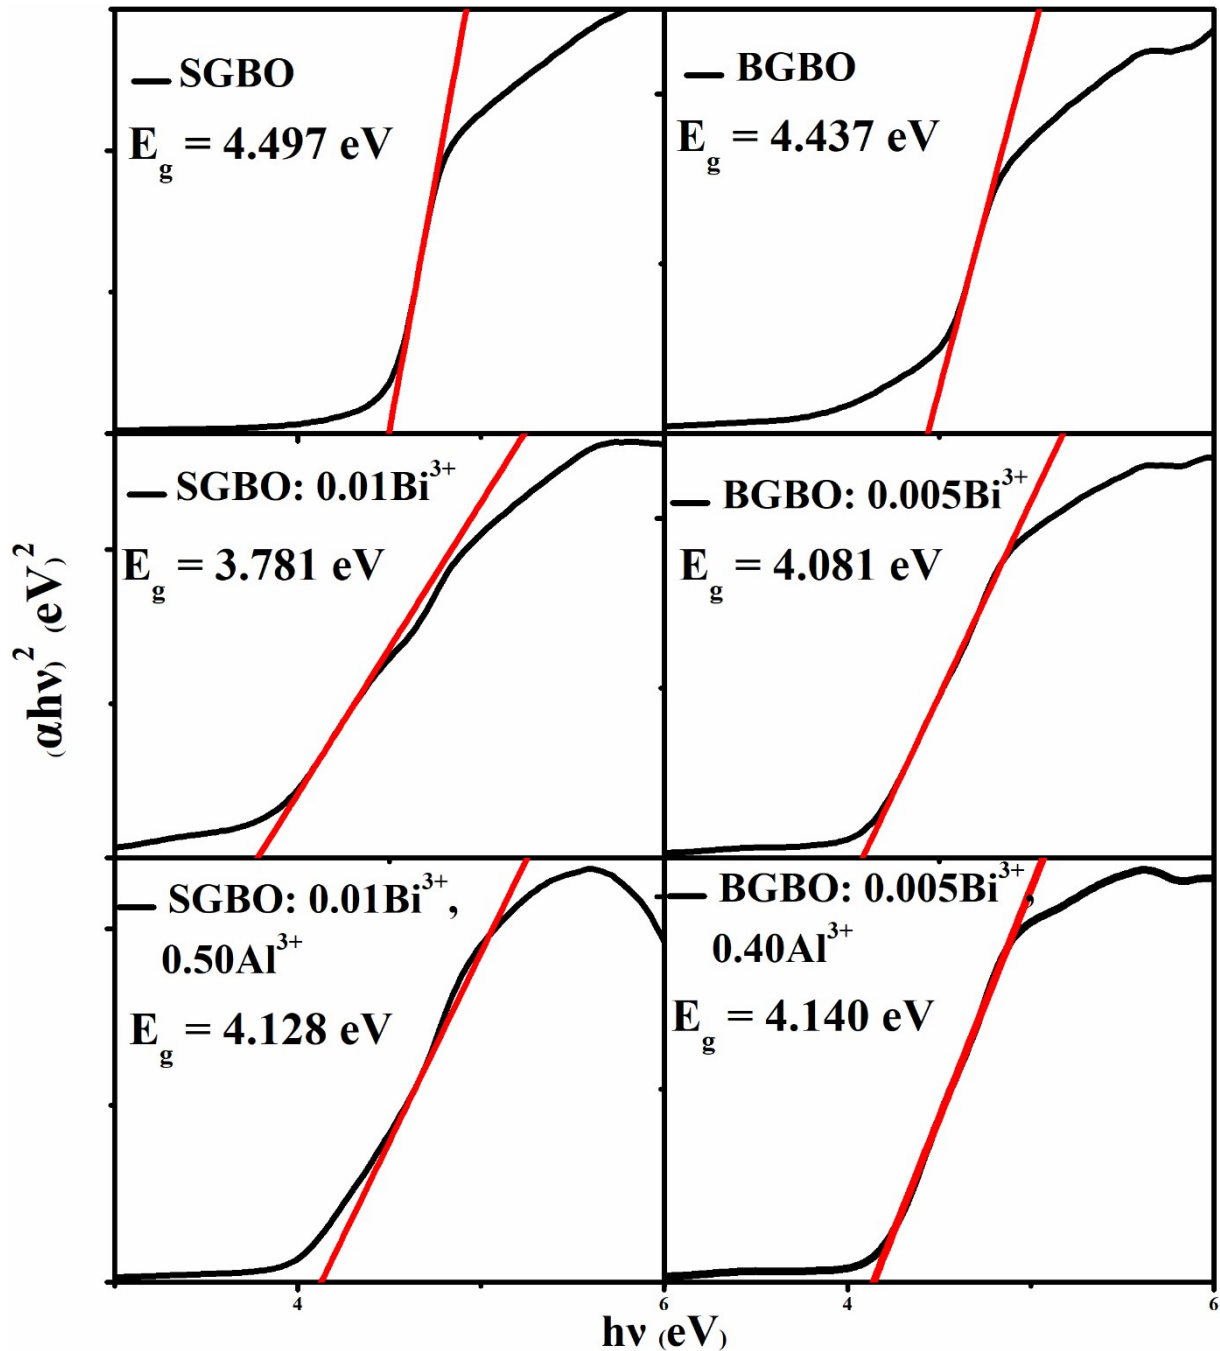

Figure S2. Band gap of SGBO and BGBO phosphors.

## Emission spectra and interaction between Bi<sup>3+</sup> ions

According to the calculation formula of the average critical distance:<sup>3</sup>

$$R_c = 2 \left[ \frac{3V}{4\pi x_c N} \right]^{1/3} \quad (2)$$

where  $R_c$  is the critical distance between luminescent ions,  $V$  is the cell volume of the host lattice,  $x_c$  is the ratio of luminescent ions, and  $N$  is the number of lattices in a unit cell. **Table S2** is the average critical distance of Bi<sup>3+</sup> in SGBO: xBi<sup>3+</sup> phosphors and BGBO: x'Bi<sup>3+</sup> phosphors.

According to **Table S2**, it can be seen that the average critical distance of Bi<sup>3+</sup> in the MGBO: Bi<sup>3+</sup> phosphors is higher than 5 Å when concentration quenching occurs. The exchange coupling effect often occurs when the ions distance is small (~5 Å), so the reason for the concentration quenching of the MGBO: Bi<sup>3+</sup> phosphors is not the exchange coupling effect.

**Table S2.** Average critical distance of Bi<sup>3+</sup> in SGBO: xBi<sup>3+</sup> phosphors and BGBO: x'Bi<sup>3+</sup> phosphors.

| SGBO: xBi <sup>3+</sup> phosphors |        | BGBO: x'Bi <sup>3+</sup> phosphors |        |
|-----------------------------------|--------|------------------------------------|--------|
| x                                 | Rc (Å) | x'                                 | Rc (Å) |
| 0.005                             | 20.84  | 0.001                              | 34.84  |
| 0.0075                            | 18.46  | 0.0025                             | 26.20  |
| 0.01                              | 16.95  | 0.005                              | 21.21  |
| 0.025                             | 13.02  | 0.0075                             | 18.78  |
| 0.05                              | 10.75  | 0.01                               | 17.24  |
|                                   |        | 0.025                              | 13.23  |
|                                   |        | 0.05                               | 10.91  |
|                                   |        | 0.075                              | 9.79   |

The interaction between ions was calculated by the following formula:

$$\frac{I}{x} = k[1 + \beta x^{\theta/3}]^{-1} \quad (3)$$

where  $I$  is the integrated emission intensity,  $x$  is the ratio of  $\text{Bi}^{3+}$ ,  $k$  and  $\beta$  are constants,  $\theta$  represents the type of interaction between ions. With  $\theta = 3$ , the interaction is the energy transfer between adjacent ions; With  $\theta = 6$ , the interaction is electric dipole-electric dipole interaction; With  $\theta = 8$ , the interaction is electric dipole-electric quadrupole interaction; With  $\theta = 10$ , the interaction is the electric quadrupole-electric quadrupole interaction.<sup>4</sup> For SGBO:  $\text{Bi}^{3+}$  phosphors, the interaction between  $\text{Bi}^{3+}$  is the electric dipole-electric dipole interaction, and for BGBO:  $\text{Bi}^{3+}$  phosphors, the interaction between  $\text{Bi}^{3+}$  is the energy transfer between adjacent ions.

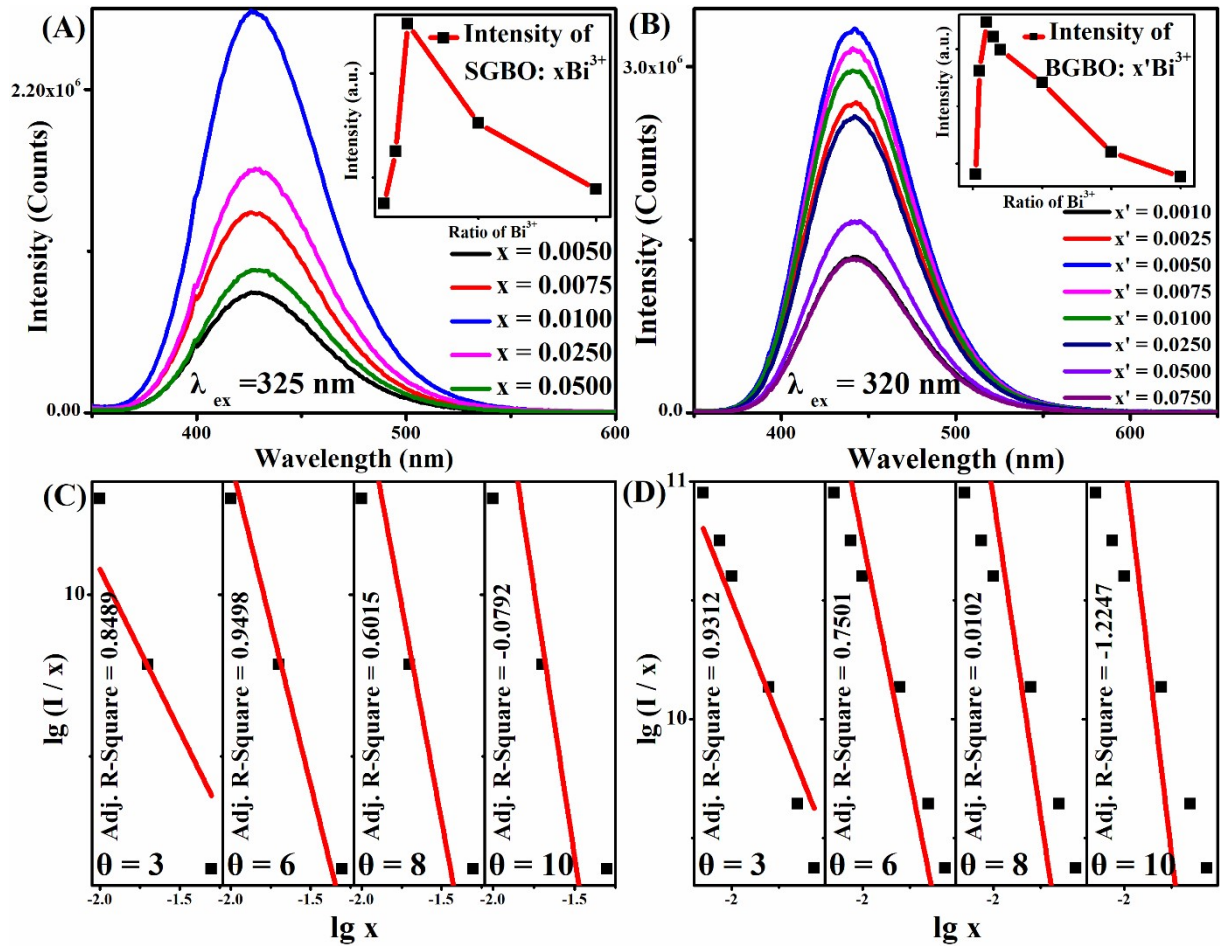

**Figure S3.** (A) Emission spectra of SGBO:  $x\text{Bi}^{3+}$  phosphors ( $x = 0.0050 \sim 0.0500$ , the insert is the emission intensity change of SGBO:  $\text{Bi}^{3+}$  phosphors); (B) Emission spectra of BGBO:  $\text{Bi}^{3+}$  phosphors ( $x' = 0.0010 \sim 0.0750$ , the insert is the emission intensity change of BGBO:  $\text{Bi}^{3+}$  phosphors); (C) Concentration quenching of SGBO:  $\text{Bi}^{3+}$  phosphors; (D) Concentration quenching of BGBO:  $\text{Bi}^{3+}$  phosphors.

## Excitation spectra

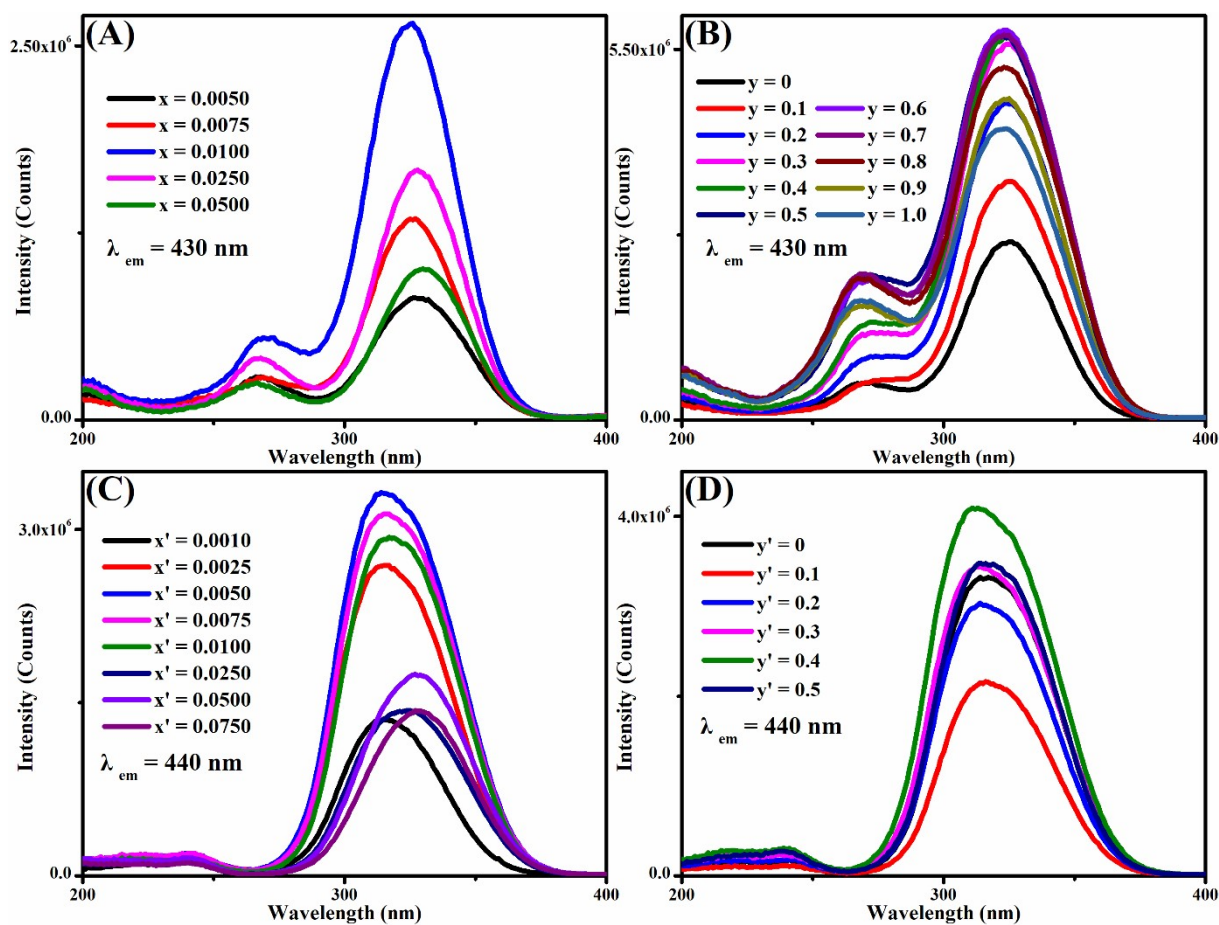

**Figure S4.** (A) Excitation spectra of SGBO:  $x\text{Bi}^{3+}$  phosphors ( $x = 0.0050 \sim 0.0500$ ); (B) Excitation of SGBO:  $0.01\text{Bi}^{3+}, y\text{Al}^{3+}$  phosphors ( $y = 0.1 \sim 1.0$ ); (C) Excitation spectra of BGBO:  $x'\text{Bi}^{3+}$  phosphors ( $x' = 0.0010 \sim 0.0750$ ); (D) Concentration quenching of BGBO:  $0.005\text{Bi}^{3+}, y'\text{Al}^{3+}$  phosphors ( $y' = 0.1 \sim 0.5$ ).



## Emission spectra of host lattice and phosphors

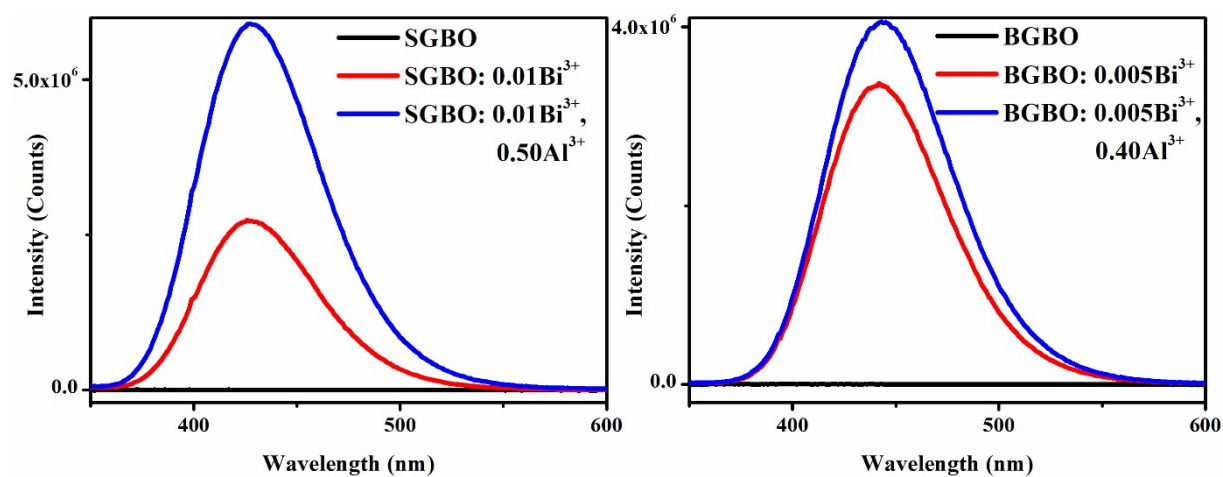

**Figure S5.** (A) Emission spectra of SGBO host lattice, SGBO: 0.01Bi<sup>3+</sup> phosphor, SGBO: 0.01Bi<sup>3+</sup>, 0.50Al<sup>3+</sup> phosphor; (B) Emission spectra of BGBO host lattice, BGBO: 0.005Bi<sup>3+</sup> phosphor, BGBO: 0.005Bi<sup>3+</sup>, 0.40Al<sup>3+</sup> phosphor.

## Raman spectra

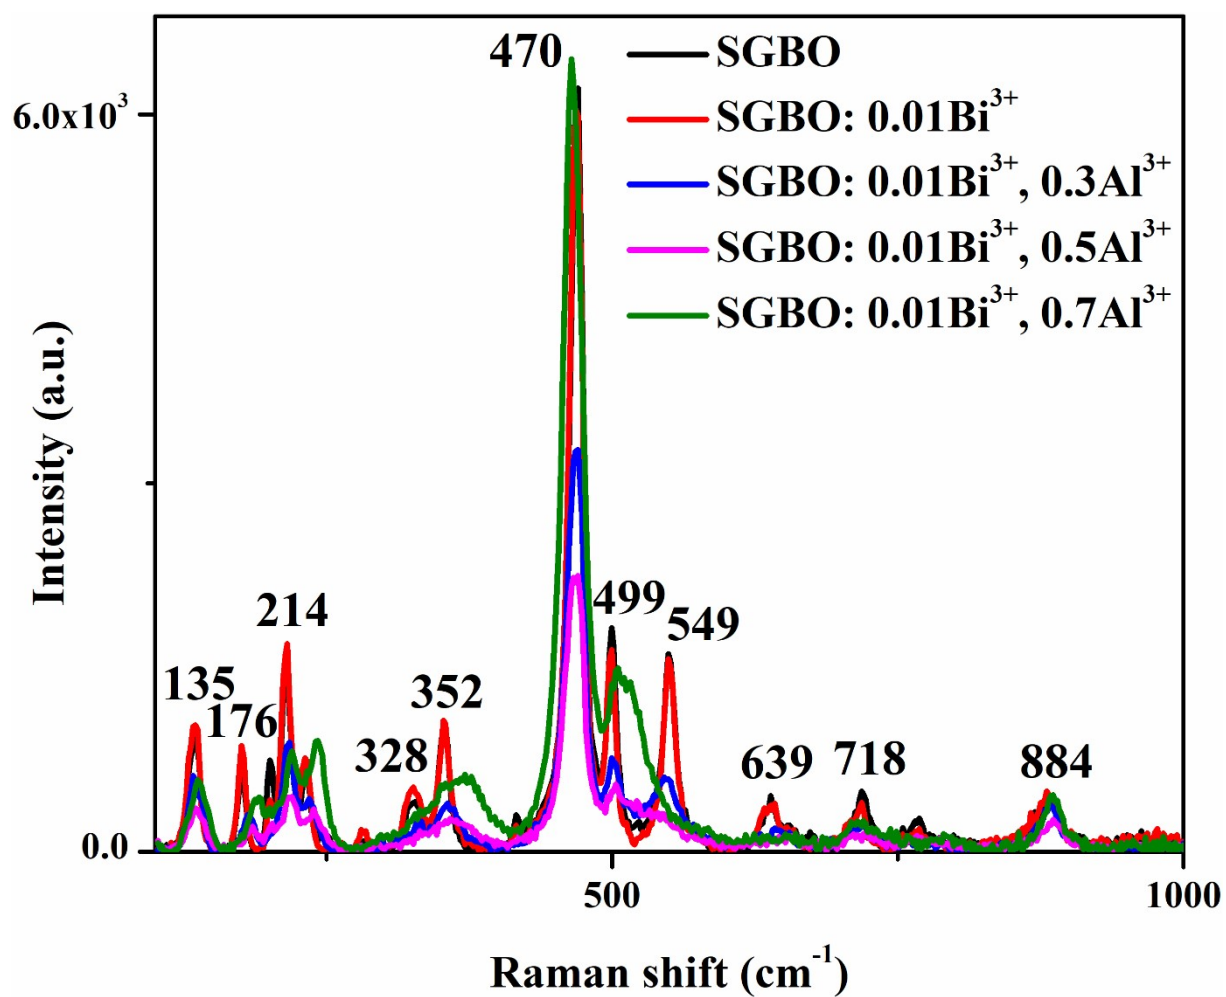

**Figure S6.** Raman spectra of SGBO host lattice and  $\text{Sr}_{0.99}\text{Ga}_{2-y}\text{B}_2\text{O}_7: 0.01\text{Bi}^{3+}, y\text{Al}^{3+}$  phosphors ( $y = 0, 0.3, 0.5, 0.7$ ).

Raman spectra were collected for the SGB0: 0.01Bi<sup>3+</sup>, yAl<sup>3+</sup> with various Al doping rate. Raman spectra is directly related to the vibration modes in the structure.<sup>5-8</sup> We calculated the theoretical vibration modes for SGB0: 0.01Bi<sup>3+</sup>, yAl<sup>3+</sup> and matched each of the experimental peak with the theoretical calculation. (Table S3 and Table S4).

**Table S3.** Energy indices, symmetries and frequencies of the Raman-active modes

| Index | Symmetry        | Frequency (cm <sup>-1</sup> ) | Index | Symmetry        | Frequency (cm <sup>-1</sup> ) |
|-------|-----------------|-------------------------------|-------|-----------------|-------------------------------|
| 5     | B <sub>2g</sub> | 69.01441                      | 37    | B <sub>1g</sub> | 418.3227                      |
| 6     | B <sub>3g</sub> | 77.85386                      | 39    | A <sub>g</sub>  | 444.3741                      |
| 7     | B <sub>1g</sub> | 89.79546                      | 44    | A <sub>g</sub>  | 485.3358                      |
| 8     | B <sub>1g</sub> | 114.2123                      | 45    | B <sub>3g</sub> | 490.1057                      |
| 9     | A <sub>g</sub>  | 120.0164                      | 46    | A <sub>g</sub>  | 538.2057                      |
| 10    | B <sub>3g</sub> | 124.2526                      | 47    | B <sub>1g</sub> | 556.1181                      |
| 12    | B <sub>2g</sub> | 124.9865                      | 49    | B <sub>2g</sub> | 609.8219                      |
| 13    | A <sub>g</sub>  | 126.0872                      | 54    | B <sub>3g</sub> | 667.6285                      |
| 16    | B <sub>1g</sub> | 149.7036                      | 56    | B <sub>1g</sub> | 688.9099                      |
| 18    | B <sub>3g</sub> | 162.6125                      | 57    | A <sub>g</sub>  | 695.6146                      |
| 23    | B <sub>2g</sub> | 201.1392                      | 59    | B <sub>1g</sub> | 719.7646                      |
| 24    | A <sub>g</sub>  | 204.1079                      | 62    | A <sub>g</sub>  | 850.0214                      |
| 25    | B <sub>3g</sub> | 208.2441                      | 64    | B <sub>1g</sub> | 995.9223                      |
| 29    | B <sub>1g</sub> | 276.2911                      | 65    | B <sub>1g</sub> | 1231.118                      |
| 30    | B <sub>2g</sub> | 301.8422                      | 67    | A <sub>g</sub>  | 1264.742                      |
| 32    | B <sub>3g</sub> | 308.2132                      | 71    | A <sub>g</sub>  | 1343.463                      |
| 33    | A <sub>g</sub>  | 311.5489                      | 72    | B <sub>1g</sub> | 1346.065                      |
| 36    | B <sub>1g</sub> | 328.2271                      |       |                 |                               |

**Table S4.** Correspondence between the measured Raman spectral peak positions and the calculated results

| Index | Symmetry | Calculated<br>Frequency( $\text{cm}^{-1}$ ) | Experimental<br>Frequency( $\text{cm}^{-1}$ ) |
|-------|----------|---------------------------------------------|-----------------------------------------------|
| 9     | $A_g$    | 120.0164                                    | 135                                           |
| 16    | $B_{1g}$ | 149.7036                                    | 176                                           |
| 23    | $B_{2g}$ | 201.1392                                    | 200                                           |
| 24    | $A_g$    | 204.1079                                    | 214                                           |
| 25    | $B_{3g}$ | 208.2441                                    | 233                                           |
| 30    | $B_{2g}$ | 301.8422                                    | 328                                           |
| 36    | $B_{1g}$ | 328.2271                                    | 352                                           |
| 39    | $A_g$    | 444.3741                                    | 470                                           |
| 44    | $A_g$    | 485.3358                                    | 499                                           |
| 46    | $A_g$    | 538.2057                                    | 549                                           |
| 49    | $B_{2g}$ | 609.8219                                    | 639                                           |
| 57    | $A_g$    | 695.6146                                    | 718                                           |
| 62    | $A_g$    | 850.0214                                    | 884                                           |

The lattice constants were calculated as 7.297 Å and 5.854 Å, agreeing with experimental results. At  $\Gamma$  point, 72 phonon modes were calculated, however, only 35 modes with symmetries  $A_g$ ,  $B_{1g}$ ,  $B_{2g}$ , and  $B_{3g}$  are Raman active. **Table S3** lists the energy eigenvalues and symmetries of these Raman-active modes. By comparing theory with experiment, we can identify that the mode with the highest Raman signal strength is the 39<sup>th</sup> mode with symmetry  $A_g$ . Other major peaks can also be identified accordingly. **Table S4** lists the correspondence between the measured Raman spectral peak positions and the calculated results.

## Quantum yields

The quantum yield is tested using an integrating sphere and calculated according to equation:<sup>9</sup>

$$QY = \frac{P_c}{L_a - L_c}$$

(6)

where QY is the quantum yield,  $P_c$  is the count of emitted photons of the sample in the integrating sphere,  $L_a$  is the count of reflected photons of the excitation light in the integrating sphere with a blank background, and  $L_c$  is the count of reflected photons of the excitation light in the integrating sphere of the sample.

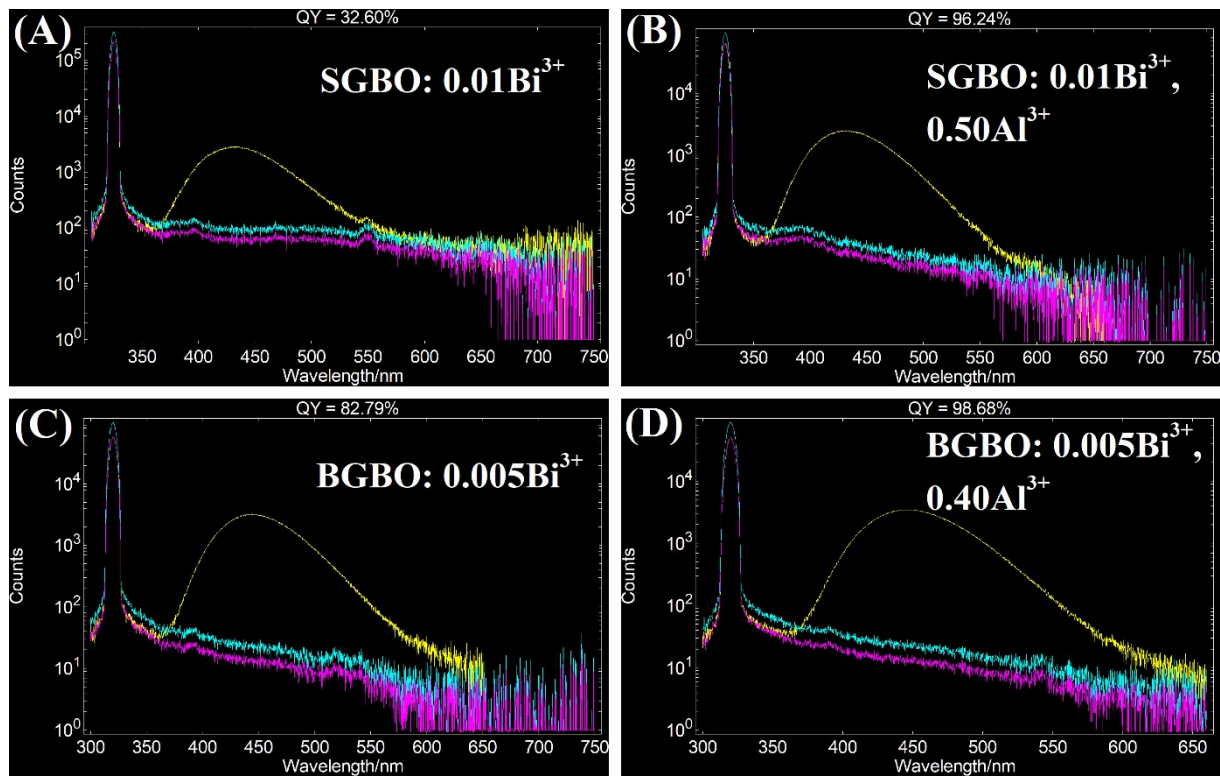

**Figure S7.** Quantum yield of (A)  $\text{Sr}_{0.99}\text{Ga}_2\text{B}_2\text{O}_7: 0.01\text{Bi}^{3+}$ ; (B)  $\text{Sr}_{0.99}\text{Ga}_{1.50}\text{B}_2\text{O}_7: 0.01\text{Bi}^{3+}, 0.50\text{Al}^{3+}$ ; (C)  $\text{Ba}_{0.995}\text{Ga}_2\text{B}_2\text{O}_7: 0.005\text{Bi}^{3+}$ ; (D)  $\text{Ba}_{0.995}\text{Ga}_{1.60}\text{B}_2\text{O}_7: 0.005\text{Bi}^{3+}, 0.40\text{Al}^{3+}$  phosphors.

**Table S5.** Quantum yield of  $M\text{GBO: Bi}^{3+}, \text{Al}^{3+}$  ( $M = \text{Sr, Ba}$ )

| SGBO: $0.01\text{Bi}^{3+}, y\text{Al}^{3+}$ |               | BGBO: $0.005\text{Bi}^{3+}, y'\text{Al}^{3+}$ |               |
|---------------------------------------------|---------------|-----------------------------------------------|---------------|
| Ratio of $\text{Al}^{3+}$                   | Quantum yield | Ratio of $\text{Al}^{3+}$                     | Quantum yield |
| 0                                           | 33%           | 0                                             | 83%           |
| 0.10                                        | 72%           | 0.10                                          | 46%           |
| 0.20                                        | 80%           | 0.20                                          | 65%           |
| 0.30                                        | 88%           | 0.30                                          | 85%           |
| 0.40                                        | 92%           | <b>0.40</b>                                   | <b>99%</b>    |
| <b>0.50</b>                                 | <b>96%</b>    | 0.50                                          | 87%           |
| 0.60                                        | 93%           |                                               |               |
| 0.70                                        | 93%           |                                               |               |
| 0.80                                        | 83%           |                                               |               |
| 0.90                                        | 74%           |                                               |               |
| 1.00                                        | 72%           |                                               |               |

**Table S6.** Quantum yield and emission color of Bi<sup>3+</sup> doped phosphors

| Color                                                                               | Phosphor                                                                                          | Quantum yield                                                      | Ref   |
|-------------------------------------------------------------------------------------|---------------------------------------------------------------------------------------------------|--------------------------------------------------------------------|-------|
| red                                                                                 | ScVO <sub>4</sub> : Bi <sup>3+</sup>                                                              | 56%                                                                | 10    |
| orange                                                                              | CaBaZn <sub>2</sub> Ga <sub>2</sub> O <sub>7</sub> : Bi <sup>3+</sup>                             | 16.0%                                                              | 11    |
| yellow                                                                              | CaBaZn <sub>2</sub> Ga <sub>2</sub> O <sub>7</sub> : Bi <sup>3+</sup>                             | 13.4%                                                              | 11    |
|                                                                                     | Sr <sub>2</sub> Zn <sub>2</sub> Ga <sub>2</sub> O <sub>7</sub> : Bi <sup>3+</sup>                 | 22.3%                                                              | 11    |
|                                                                                     | La <sub>3</sub> BWO <sub>9</sub> : Bi <sup>3+</sup>                                               | 19.2%                                                              | 12    |
|                                                                                     | KLaTa <sub>2</sub> O <sub>7</sub> : Bi <sup>3+</sup>                                              | 42.3%                                                              | 13    |
|                                                                                     | LuVO <sub>4</sub> : Bi <sup>3+</sup>                                                              | 68%                                                                | 14    |
|                                                                                     | green                                                                                             | Ba <sub>3</sub> Y <sub>4</sub> O <sub>9</sub> : Bi <sup>3+</sup>   | 24.7% |
| CaAl <sub>4</sub> O <sub>7</sub> : Bi <sup>3+</sup>                                 |                                                                                                   | 39%                                                                | 16    |
| LiCa <sub>3</sub> MgV <sub>3</sub> O <sub>12</sub> : Bi <sup>3+</sup>               |                                                                                                   | 43.9%                                                              | 17    |
| Ba <sub>9</sub> Y <sub>2</sub> Si <sub>6</sub> O <sub>24</sub> : Bi <sup>3+</sup>   |                                                                                                   | 64.5%                                                              | 18    |
| YVO <sub>4</sub> : Bi <sup>3+</sup>                                                 |                                                                                                   | 74.8%                                                              | 19    |
| blue                                                                                |                                                                                                   | Gd <sub>3</sub> Ga <sub>5</sub> O <sub>12</sub> : Bi <sup>3+</sup> | 15.4% |
|                                                                                     | Gd <sub>2</sub> ZnTiO <sub>6</sub> : Bi <sup>3+</sup>                                             | 18%                                                                | 21    |
|                                                                                     | Sr <sub>2</sub> MgSi <sub>2</sub> O <sub>7</sub> : Bi <sup>3+</sup>                               | 20.6%                                                              | 22    |
|                                                                                     | La <sub>2</sub> Zr <sub>2</sub> O <sub>7</sub> : Bi <sup>3+</sup>                                 | 32.6%                                                              | 23    |
|                                                                                     | YNbO <sub>4</sub> : Bi <sup>3+</sup>                                                              | 45.6%                                                              | 19    |
|                                                                                     | La <sub>2</sub> (GeO <sub>4</sub> )O: Bi <sup>3+</sup>                                            | 48%                                                                | 24    |
|                                                                                     | Ca <sub>14</sub> Al <sub>10</sub> Zn <sub>6</sub> O <sub>35</sub> : Bi <sup>3+</sup>              | 49.0%                                                              | 25    |
|                                                                                     | Ba <sub>9</sub> Y <sub>2</sub> Si <sub>6</sub> O <sub>24</sub> : Bi <sup>3+</sup>                 | 51.6%                                                              | 18    |
|                                                                                     | Sr <sub>3</sub> Lu <sub>2</sub> Ge <sub>3</sub> O <sub>12</sub> : Bi <sup>3+</sup>                | 57%                                                                | 26    |
|                                                                                     | Sr <sub>2</sub> Y <sub>8</sub> (SiO <sub>4</sub> ) <sub>6</sub> O <sub>2</sub> : Bi <sup>3+</sup> | 74.8%                                                              | 27    |
|                                                                                     | La <sub>2</sub> (Zn <sub>0.4</sub> , Mg <sub>0.6</sub> )TiO <sub>6</sub> : Bi <sup>3+</sup>       | 75%                                                                | 28    |
|                                                                                     | Lu <sub>2</sub> Ge <sub>2</sub> O <sub>7</sub> : Bi <sup>3+</sup>                                 | 76%                                                                | 29    |
|                                                                                     | SrGa <sub>2</sub> B <sub>2</sub> O <sub>7</sub> : Bi <sup>3+</sup> , Dy <sup>3+</sup>             | 64.5%                                                              | 30    |
|                                                                                     | Ca <sub>4</sub> ZrGe <sub>3</sub> O <sub>12</sub> : Bi <sup>3+</sup>                              | 81.3%                                                              | 31    |
|                                                                                     | Ca <sub>4</sub> ZrGe <sub>3</sub> O <sub>12</sub> : Bi <sup>3+</sup> , Sr <sup>2+</sup>           | 82.0%                                                              |       |
|                                                                                     | Ca <sub>4</sub> ZrGe <sub>3</sub> O <sub>12</sub> : Bi <sup>3+</sup> , Si <sup>4+</sup>           | 88.1%                                                              |       |
| <b>SrGa<sub>2</sub>B<sub>2</sub>O<sub>7</sub>: Bi<sup>3+</sup>, Al<sup>3+</sup></b> | <b>96%</b>                                                                                        | <b>This work</b>                                                   |       |
| <b>BaGa<sub>2</sub>B<sub>2</sub>O<sub>7</sub>: Bi<sup>3+</sup>, Al<sup>3+</sup></b> | <b>99%</b>                                                                                        |                                                                    |       |

## Variable-temperature photoluminescence

The thermal quenching activation energy was calculated by the following formula:<sup>32</sup>

$$\ln \left( \frac{I_0}{I} - 1 \right) = \ln C - \frac{\Delta E_a}{\kappa T} \quad (7)$$

where  $I_0$  is the integrated emission intensity at room temperature,  $I$  is the integrated emission intensity at high temperature,  $C$  is constant,  $\kappa$  is the Boltzmann constant,  $T$  is the temperature,  $\Delta E_a$  is the thermal quenching activation energy.

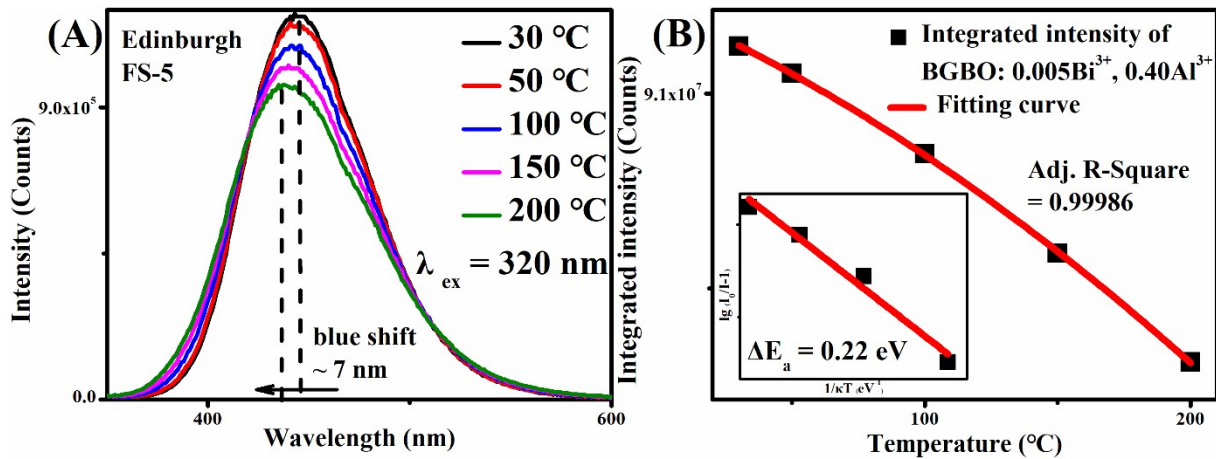

**Figure S8.** (A) Photoluminescence emission spectra of  $\text{Ba}_{0.995}\text{Ga}_{1.60}\text{B}_2\text{O}_7: 0.005\text{Bi}^{3+}, 0.40\text{Al}^{3+}$  phosphor at different temperatures (30 ~ 200 °C); (B) Thermal stability and thermal quenching activation energy of  $\text{Ba}_{0.995}\text{Ga}_{1.60}\text{B}_2\text{O}_7: 0.005\text{Bi}^{3+}, 0.40\text{Al}^{3+}$  phosphor.



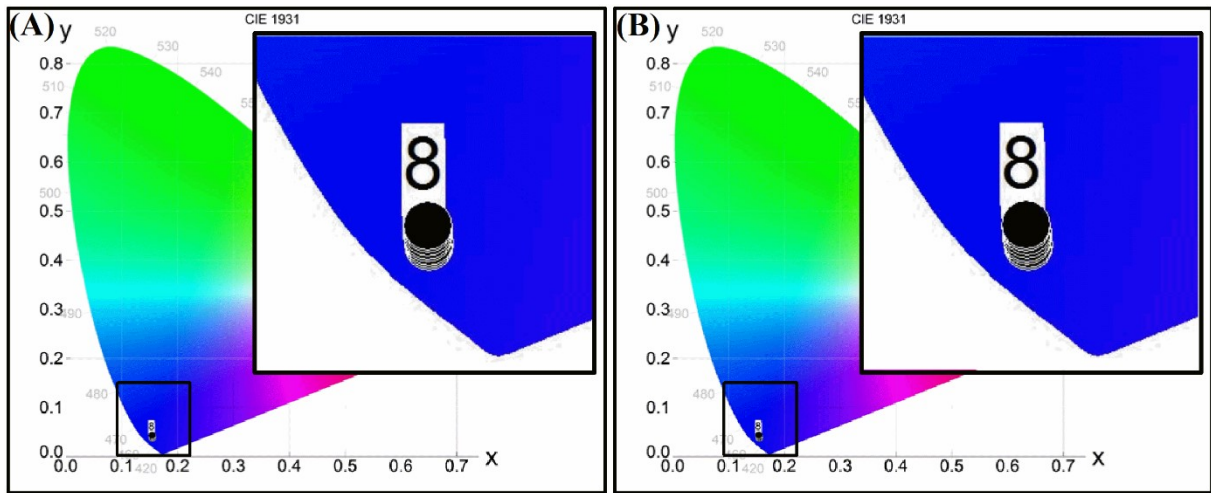

**Figure S9.** (A & B) 1931 CIE and 1976 CIE chromaticity coordinates of SGBO: 0.01Bi<sup>3+</sup> phosphor at different temperatures.

**Table S7.** 1931 CIE chromaticity coordinates of SGBO: 0.01Bi<sup>3+</sup> and SGBO: 0.01Bi<sup>3+</sup>, 0.50Al<sup>3+</sup> phosphors at different temperatures.

| Temperature (°C) | SGBO: 0.01Bi <sup>3+</sup> | SGBO: 0.01Bi <sup>3+</sup> , 0.50Al <sup>3+</sup> |
|------------------|----------------------------|---------------------------------------------------|
| 25               | (0.1550, 0.0372)           | (0.1550, 0.0373)                                  |
| 50               | (0.1549, 0.0379)           | (0.1549, 0.0380)                                  |
| 75               | (0.1549, 0.0387)           | (0.1548, 0.0390)                                  |
| 100              | (0.1548, 0.0396)           | (0.1547, 0.0399)                                  |
| 125              | (0.1547, 0.0406)           | (0.1546, 0.0409)                                  |
| 150              | (0.1547, 0.0415)           | (0.1546, 0.0418)                                  |
| 175              | (0.1546, 0.0424)           | (0.1545, 0.0428)                                  |
| 200              | (0.1546, 0.0433)           | (0.1545, 0.0437)                                  |

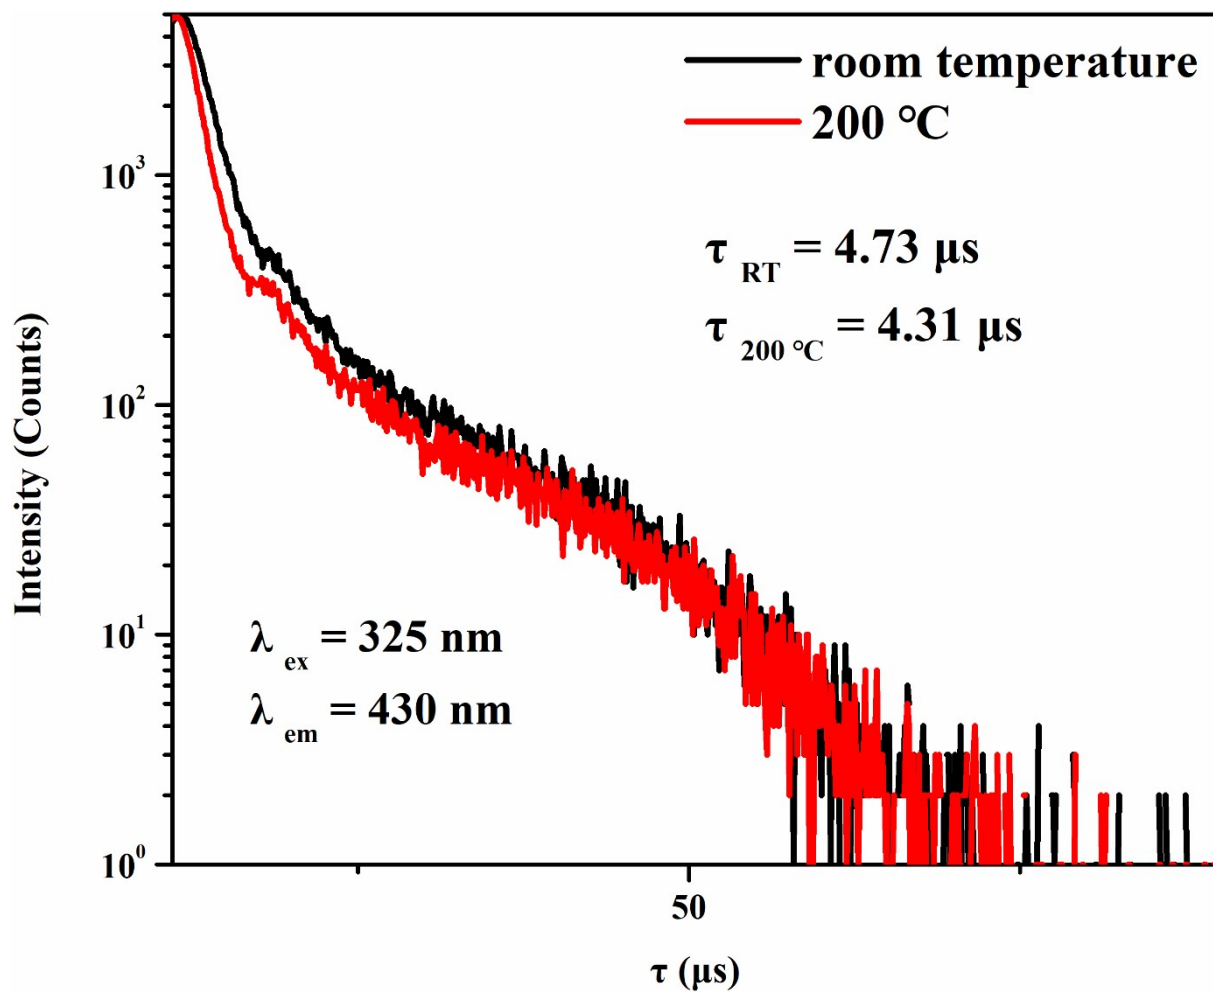

**Figure S10.** Fluorescence decay spectra and fluorescence lifetime of SGBO: 0.01Bi<sup>3+</sup>, 0.50Al<sup>3+</sup> phosphors at room temperature and 200 °C.

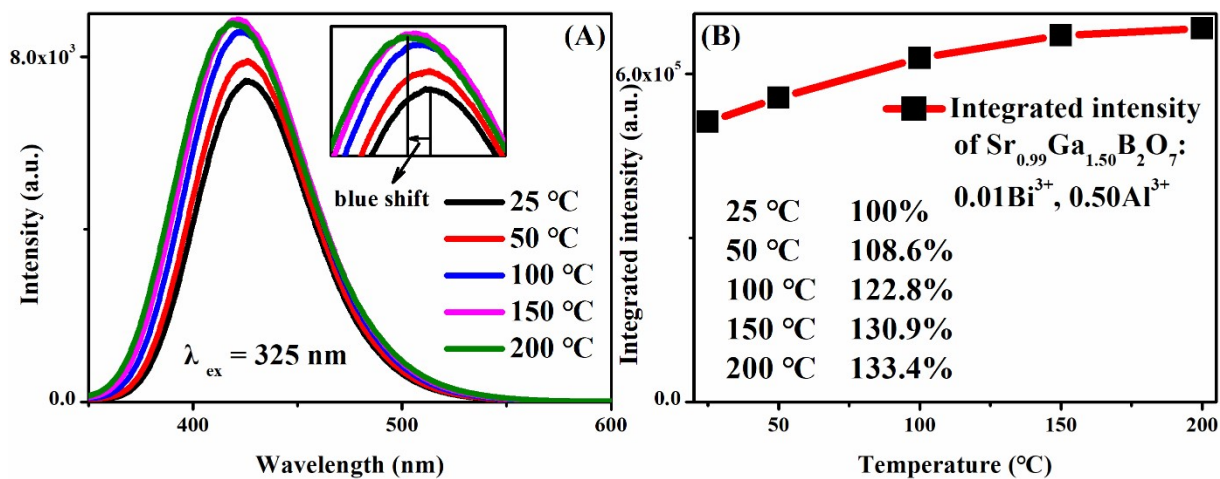

**Figure S11.** (A) Emission spectra of the second heating process for  $\text{Sr}_{0.99}\text{Ga}_{1.50}\text{B}_2\text{O}_7: 0.01\text{Bi}^{3+}, 0.50\text{Al}^{3+}$  phosphor between 30 ~ 200 °C (measured with F-7000, Hitachi, Japan); (B) Emission intensity change for the second heating process of  $\text{Sr}_{0.99}\text{Ga}_{1.50}\text{B}_2\text{O}_7: 0.01\text{Bi}^{3+}, 0.50\text{Al}^{3+}$  phosphor between 30 ~ 200 °C.

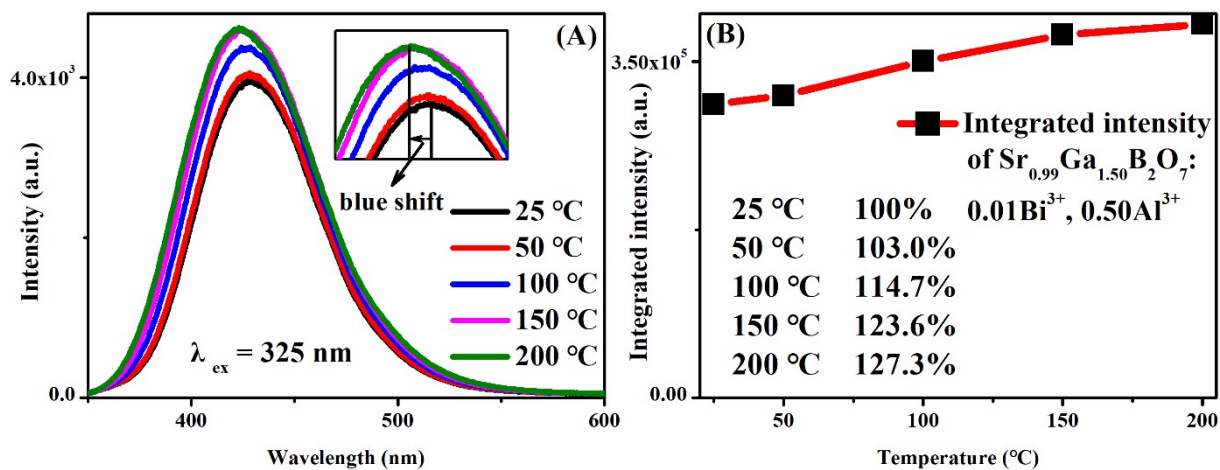

**Figure S12.** (A) Emission spectra of the  $\text{Sr}_{0.99}\text{Ga}_{1.50}\text{B}_2\text{O}_7: 0.01\text{Bi}^{3+}, 0.50\text{Al}^{3+}$  phosphor between 30 ~ 200 °C (measured with F-4600, Hitachi, Japan); (B) Emission intensity change of the  $\text{Sr}_{0.99}\text{Ga}_{1.50}\text{B}_2\text{O}_7: 0.01\text{Bi}^{3+}, 0.50\text{Al}^{3+}$  phosphor between 30 ~ 200 °C.

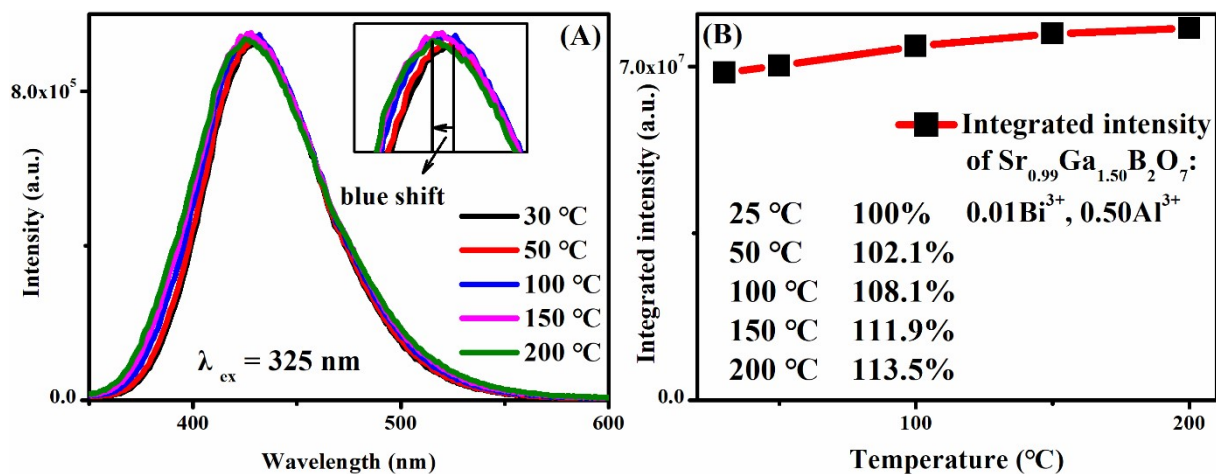

**Figure S13.** (A) Emission spectra of the  $\text{Sr}_{0.99}\text{Ga}_{1.50}\text{B}_2\text{O}_7: 0.01\text{Bi}^{3+}, 0.50\text{Al}^{3+}$  phosphor between 30 ~ 200 °C (measured with FS-5, Edinburgh, The UK); (B) Emission intensity change of the  $\text{Sr}_{0.99}\text{Ga}_{1.50}\text{B}_2\text{O}_7: 0.01\text{Bi}^{3+}, 0.50\text{Al}^{3+}$  phosphor between 30 ~ 200 °C.

## Variable temperature XRD patterns

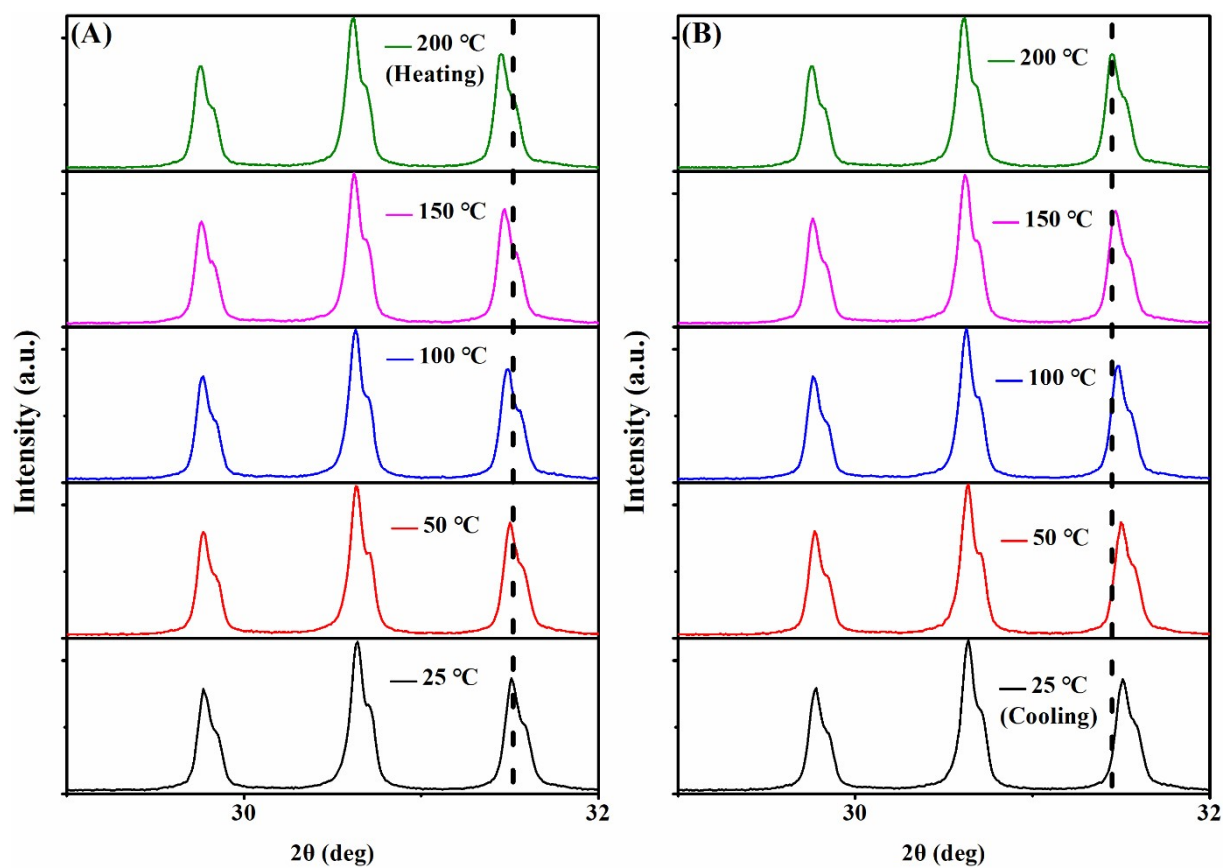

**Figure S14.** Variable temperature XRD patterns of  $\text{Sr}_{0.99}\text{Ga}_{1.50}\text{B}_2\text{O}_7: 0.01\text{Bi}^{3+}, 0.50\text{Al}^{3+}$  phosphor ( $2\theta$  range is 29 ~ 32 °).

## White LEDs performance

**Table S8.** 1931CIE color coordinates, color temperatures and color render index of the white LED using  $\text{Sr}_{0.99}\text{Ga}_{1.50}\text{B}_2\text{O}_7: 0.01\text{Bi}^{3+}, 0.50\text{Al}^{3+}$  as the blue phosphor with the current range of 20 - 300 mA.

| Current (mA) | CIE (x, y)     | Color temperature<br>(K) | Ra   |
|--------------|----------------|--------------------------|------|
| 20           | (0.327,0.367)  | 5736                     | 91.5 |
| 40           | (0.327,0.367)  | 5753                     | 90.9 |
| 60           | (0.326,0.368)  | 5772                     | 91   |
| 80           | (0.325,0.365)  | 5787                     | 91.3 |
| 100          | (0.325,0.362)  | 5813                     | 91.7 |
| 120          | (0.324,0.3637) | 5853                     | 91.6 |
| 140          | (0.323,0.360)  | 5871                     | 91.9 |
| 160          | (0.323,0.358)  | 5885                     | 92.1 |
| 180          | (0.323,0.357)  | 5903                     | 91.6 |
| 200          | (0.322,0.356)  | 5953                     | 92.2 |
| 220          | (0.321,0.354)  | 5990                     | 92.5 |
| 240          | (0.321,0.353)  | 6008                     | 92.7 |
| 260          | (0.320,0.352)  | 6038                     | 92.8 |
| 280          | (0.319,0.350)  | 6073                     | 93.0 |
| 300          | (0.319,0.349)  | 6102                     | 93.0 |



**Table S9.** 1931CIE color coordinates, color temperatures and color render index of the white LED using  $\text{Ba}_{0.995}\text{Ga}_{1.60}\text{B}_2\text{O}_7: 0.005\text{Bi}^{3+}, 0.40\text{Al}^{3+}$  as the blue phosphor with the current range of 20 ~ 300 mA.

| Current (mA) | CIE (x, y)     | Color temperature<br>(K) | Ra   |
|--------------|----------------|--------------------------|------|
| 20           | (0.349,0.395)  | 4994                     | 92.8 |
| 40           | (0.349, 0.390) | 4993                     | 91.8 |
| 60           | (0.350, 0.388) | 4947                     | 88.3 |
| 80           | (0.349, 0.391) | 4997                     | 92.5 |
| 100          | (0.349, 0.391) | 4998                     | 93.0 |
| 120          | (0.349, 0.392) | 4995                     | 92.8 |
| 140          | (0.349, 0.392) | 4990                     | 92.7 |
| 160          | (0.350, 0.392) | 4977                     | 92.6 |
| 180          | (0.350, 0.392) | 4967                     | 92.7 |
| 200          | (0.350, 0.392) | 4954                     | 92.4 |
| 220          | (0.351, 0.393) | 4943                     | 92.5 |
| 240          | (0.352, 0.394) | 4920                     | 92.5 |
| 260          | (0.352, 0.394) | 4901                     | 92.4 |
| 280          | (0.353, 0.395) | 4875                     | 92.3 |
| 300          | (0.354, 0.395) | 4853                     | 92.3 |

## SI References

1. J. I. Pankove, *Optical Processes in Semiconductors*, Courier Corporation, 1975.
2. L. Kazmerski, *Polycrystalline and Amorphous Thin Films and Devices*, Elsevier, 2012.
3. G. Blasse, Energy transfer in oxidic phosphors, *Philips Res. Rep.*, 1969, **24**, 131-144.
4. L. Van Uitert and L. Johnson, Energy transfer between rare-earth ions, *J. Chem. Phys.*, 1966, **44**, 3514-3522.
5. D. A. Long, *Raman Spectroscopy*, New York, 1977, 1-12.
6. P. L. Polavarapu, Ab initio vibrational Raman and Raman optical activity spectra, *J. Phys. Chem.*, 1990, **94**, 8106-8112.
7. E. Duval, Far-infrared and Raman vibrational transitions of a solid sphere: Selection rules, *Phys. Rev. B*, 1992, **46**, 5795.
8. R. Fei and L. Yang, Lattice vibrational modes and Raman scattering spectra of strained phosphorene, *Appl. Phys. Lett.*, 2014, **105**, 083120.
9. S. Leyre, E. Coutino-Gonzalez, J. Joos, J. Ryckaert, Y. Meuret, D. Poelman, P. Smet, G. Durinck, J. Hofkens and G. Deconinck, Absolute determination of photoluminescence quantum efficiency using an integrating sphere setup, *Rev. Sci. Instrum.*, 2014, **85**, 123115.
10. F. Kang, X. Yang, M. Peng, L. Wondraczek, Z. Ma, Q. Zhang and J. Qiu, Red photoluminescence from Bi<sup>3+</sup> and the influence of the oxygen-vacancy perturbation in ScVO<sub>4</sub>: a combined experimental and theoretical study, *J. Phys. Chem. C*, 2014, **118**, 7515-7522.
11. D. Liu, X. Yun, P. Dang, H. Lian, M. Shang, G. Li and J. Lin, Yellow/Orange-Emitting ABZn<sub>2</sub>Ga<sub>2</sub>O<sub>7</sub>: Bi<sup>3+</sup> (A= Ca, Sr; B= Ba, Sr) Phosphors: Optical Temperature Sensing and White Light-Emitting Diode Applications, *Chem. Mat.*, 2020, **32**, 3065-3077.
12. J. Han, F. Pan, M. S. Molokeev, J. Dai, M. Peng, W. Zhou and J. Wang, Redefinition of crystal structure and Bi<sup>3+</sup> yellow luminescence with strong near-ultraviolet excitation in La<sub>3</sub>BWO<sub>9</sub>: Bi<sup>3+</sup> phosphor for white light-emitting diodes, *ACS Appl. Mater. Interfaces*, 2018, **10**, 13660-13668.
13. G. Zhou, X. Jiang, J. Zhao, M. Molokeev, Z. Lin, Q. Liu and Z. Xia, Two-dimensional-layered perovskite ALaTa<sub>2</sub>O<sub>7</sub>: Bi<sup>3+</sup> (A= K and Na) phosphors with versatile structures and tunable photoluminescence, *ACS Appl. Mater. Interfaces*, 2018, **10**, 24648-24655.

14. F. Kang, M. Peng, Q. Zhang and J. Qiu, Abnormal anti-quenching and controllable multi-transitions of Bi<sup>3+</sup> luminescence by temperature in a yellow-emitting LuVO<sub>4</sub>: Bi<sup>3+</sup> phosphor for UV-converted white LEDs, *Chem. - Eur. J.*, 2014, **20**, 11522-11530.
15. K. Li, H. Lian, M. Shang and J. Lin, A novel greenish yellow-orange red Ba<sub>3</sub>Y<sub>4</sub>O<sub>9</sub>: Bi<sup>3+</sup>, Eu<sup>3+</sup> phosphor with efficient energy transfer for UV-LEDs, *Dalton Trans.*, 2015, **44**, 20542-20550.
16. M. Puchalska, E. Zych and P. Bolek, Luminescences of Bi<sup>3+</sup> and Bi<sup>2+</sup> ions in Bi-doped CaAl<sub>4</sub>O<sub>7</sub> phosphor powders obtained via modified Pechini citrate process, *J. Alloys Compd.*, 2019, **806**, 798-805.
17. P. Dang, S. Liang, G. Li, Y. Wei, Z. Cheng, H. Lian, M. Shang, A. A. Al Kheraif and J. Lin, Full color luminescence tuning in Bi<sup>3+</sup>/Eu<sup>3+</sup>-doped LiCa<sub>3</sub>MgV<sub>3</sub>O<sub>12</sub> garnet phosphors based on local lattice distortion and multiple energy transfers, *Inorg. Chem.*, 2018, **57**, 9251-9259.
18. H. Guo, Z. Zheng, L. Teng, R. Wei and F. Hu, Tunable white-light emission and energy transfer in single-phase Bi<sup>3+</sup>, Eu<sup>3+</sup> co-doped Ba<sub>9</sub>Y<sub>2</sub>Si<sub>6</sub>O<sub>24</sub> phosphors for UV w-LEDs, *J. Lumin.*, 2019, **213**, 494-503.
19. F. Kang, H. Zhang, L. Wondraczek, X. Yang, Y. Zhang, D. Y. Lei and M. Peng, Band-gap modulation in single Bi<sup>3+</sup>-doped yttrium–scandium–niobium vanadates for color tuning over the whole visible spectrum, *Chem. Mat.*, 2016, **28**, 2692-2703.
20. V. Tsiumra, A. Krasnikov, S. Zazubovich, Y. Zhydachevskyy, L. Vasylechko, M. Baran, L. Lipińska, M. Nikl and A. Suchocki, Crystal structure and luminescence studies of microcrystalline GGG: Bi<sup>3+</sup> and GGG: Bi<sup>3+</sup>, Eu<sup>3+</sup> as a UV-to-VIS converting phosphor for white LEDs, *J. Lumin.*, 2019, **213**, 278-289.
21. C. Ji, Z. Huang, J. Wen, J. Zhang, X. Tian, H. He, L. Zhang, T.-H. Huang, W. Xie and Y. Peng, Blue-emitting Bi-doped double perovskite Gd<sub>2</sub>ZnTiO<sub>6</sub> phosphor with near-ultraviolet excitation for warm white light-emitting diodes, *J. Alloys Compd.*, 2019, **788**, 1127-1136.
22. B. Yuan, Y. Song, L. Kong, C. Dai and H. Zou, The sensitized luminescence and tunable color of single-component Sr<sub>2</sub>MgSi<sub>2</sub>O<sub>7</sub>: Bi<sup>3+</sup>/Sm<sup>3+</sup>/Tb<sup>3+</sup> phosphor via energy transfer for white-light emitting diodes, *Phys. B (Amsterdam, Neth.)*, 2018, **550**, 75-89.
23. R. Cao, G. Quan, Z. Shi, T. Chen, Z. Luo, G. Zheng and Z. Hu, Synthesis and luminescence properties of La<sub>2</sub>Zr<sub>2</sub>O<sub>7</sub>: R (R= Sm<sup>3+</sup>, Bi<sup>3+</sup>, Sm<sup>3+</sup>/Bi<sup>3+</sup>) phosphor, *J. Phys. Chem. Solids*, 2018, **118**, 109-113.

24. S. Zhang, H. Luo, Z. Mu, J. Li, S. Guo, Z. Li, Q. Wang and F. Wu, Photoluminescence and tunable emissions of  $\text{La}_2(\text{GeO}_4)\text{O}:\text{Bi}^{3+}, \text{Eu}^{3+}$  phosphor for ultraviolet converted light emitting diodes, *J. Alloys Compd.*, 2018, **757**, 423-433.
25. L. Li, Y. Pan, Y. Huang, S. Huang and M. Wu, Dual-emissions with energy transfer from the phosphor  $\text{Ca}_{14}\text{Al}_{10}\text{Zn}_6\text{O}_{35}:\text{Bi}^{3+}, \text{Eu}^{3+}$  for application in agricultural lighting, *J. Alloys Compd.*, 2017, **724**, 735-743.
26. Q. Wu, Y. Li, Y. Wang, H. Liu, S. Ye, L. Zhao, J. Ding and J. Zhou, A novel narrow-band blue-emitting phosphor of  $\text{Bi}^{3+}$ -activated  $\text{Sr}_3\text{Lu}_2\text{Ge}_3\text{O}_{12}$  based on a highly symmetrical crystal structure used for WLEDs and FEDs, *Chem. Eng. J.*, 2020, **401**, 126130.
27. K. Li, J. Fan, M. Shang, H. Lian and J. Lin,  $\text{Sr}_2\text{Y}_8(\text{SiO}_4)_6\text{O}_2:\text{Bi}^{3+}/\text{Eu}^{3+}$ : a single-component white-emitting phosphor via energy transfer for UV w-LEDs, *J. Mater. Chem. C*, 2015, **3**, 9989-9998.
28. T. Xie, L. Zhang, Y. Guo, X. Wang and Y. Wang, Tuning of  $\text{Bi}^{3+}$ -related excitation and emission positions through crystal field modulation in the perovskite-structured  $\text{La}_2(\text{Zn}_x, \text{Mg}_{1-x})\text{TiO}_6$  ( $0 \leq x \leq 1$ ):  $\text{Bi}^{3+}$  solid solution for white LEDs, *Ceram. Int.*, 2019, **45**, 3502-3509.
29. Q. Li, S. Zhang, W. Lin, W. Li, Y. Li, Z. Mu and F. Wu, A warm white emission of  $\text{Bi}^{3+}\text{-Eu}^{3+}$  and  $\text{Bi}^{3+}\text{-Sm}^{3+}$  codoping  $\text{Lu}_2\text{Ge}_2\text{O}_7$  phosphors by energy transfer of  $\text{Bi}^{3+}$ -sensitized  $\text{Eu}^{3+}/\text{Sm}^{3+}$ , *Spectrochim. Acta, Part A*, 2020, **228**, 117755.
30. S. Yang, Y. Dai, Y. Shen, C. Duan, Q. Rao, H. Peng, F. Yang, Y. Shan and Q. Zhao, Blue emission from  $\text{Sr}_{0.98}\text{Ga}_2\text{B}_2\text{O}_7: 0.01 \text{Bi}^{3+}, 0.01 \text{Dy}^{3+}$  phosphor with high quantum yield, *J. Alloys Compd.*, 2019, **810**, 151849.
31. W. Yan, S. Chen, Y. Liu, Z. Gao, Y. Wei and G. Li, Giant Photoluminescence Improvement and Controllable Emission Adjustment in  $\text{Bi}^{3+}$ -Activated  $\text{Ca}_4\text{ZrGe}_3\text{O}_{12}$  Phosphors for High-Quality White Light-Emitting Diodes, *ACS Appl. Electron. Mater.*, 2019, **1**, 1970-1980.
32. S. Bhushan and M. Chukichev, Temperature dependent studies of cathodoluminescence of green band of ZnO crystals, *J. Mater. Sci. Lett.*, 1988, **7**, 319-321.
